# Supplementary material for: In situ synthesis of carbon nanotube-encapsulated cobalt nanoparticles by a novel and simple chemical treatment process: efficient and green catalysts for the Heck reaction
Source: Royal Society of Chemistry journal article supplement (doi:10.1039/c9nj00813f), 2019-01-01
Supplement: c9nj00813f1.pdf [file c9nj00813f1.pdf]

**Supporting Information**

**In Situ Synthesis of Carbon Nanotube-Encapsulated Cobalt Nanoparticles by  
a Novel and Simple Chemical Treatment Processes: Efficient and Green  
Catalysts for Heck Reaction**

- Abdol R. Hajipour\* Zahra Khorsandi and Hossein Farrokhpour\*

# 1. Catalyst characterization

## 1.1. SEM

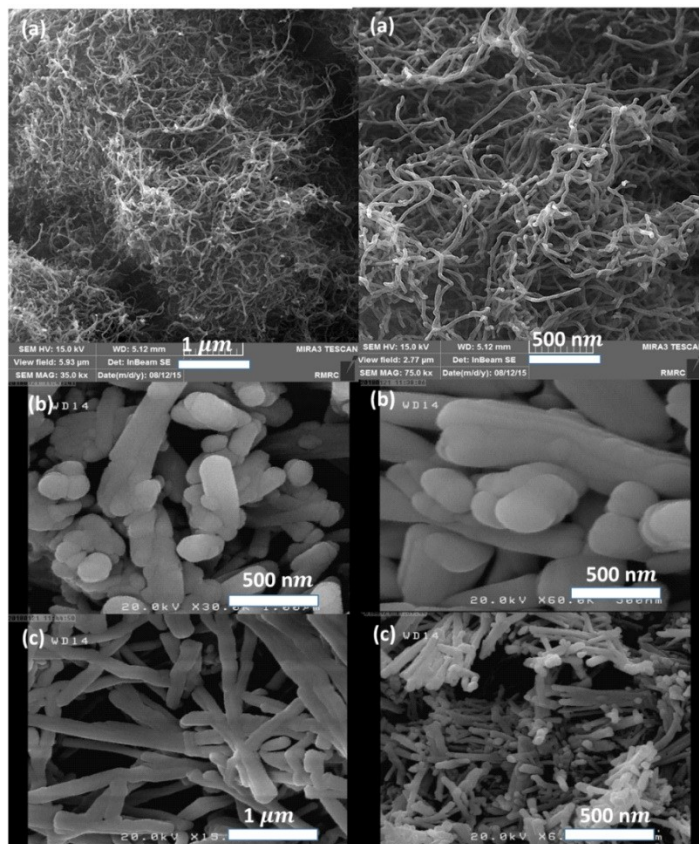

**Figure S1.** SEM images of (a) pure CNTs, (b) Co-out-CNTs, (c) Co-in-CNTs (II)

## 1.2 BET:

**Table S1.** The BET surface area of the catalysts and multiwalled CNTs measured by N<sub>2</sub> chemisorption

| Catalyst                             | Co-out-CNTs | Co-in-CNTs (I) | Co-in-CNTs (II) | CNTs<br>(end opened) |
|--------------------------------------|-------------|----------------|-----------------|----------------------|
| BET Surface Area (m <sup>2</sup> /g) | 198.6       | 201.4          | 202.2           | 210.2                |

### 1.3 XRD:

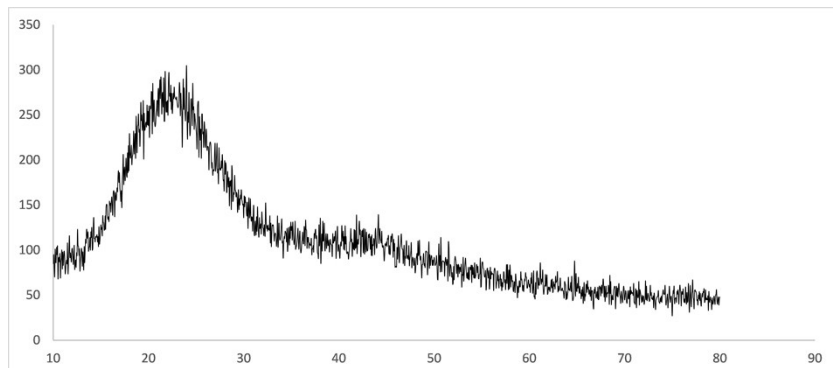

**Figure S2.** XRD patterns of Co-out-CNT the range of 10-80 degree.

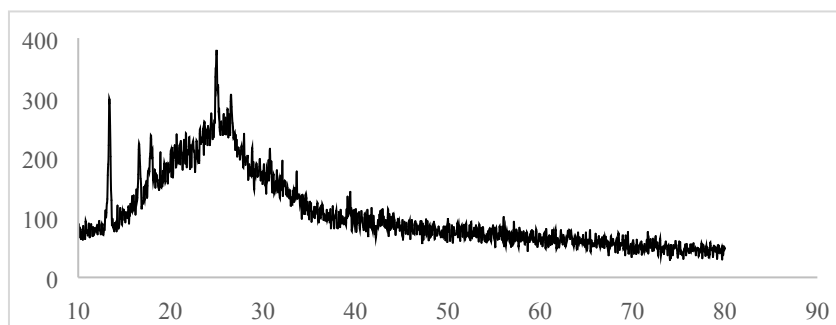

**Figure S3.** XRD patterns of Co-in-CNTs (II).

### 1.5 ICP & size of NPs:

**Table S2.** The average Co particles sizes and the amount of cobalt

| catalyst        | Average Pt particles size <sup>a</sup> (nm) | Metal dispersion <sup>b</sup> (wt%) |
|-----------------|---------------------------------------------|-------------------------------------|
| Co-out-CNTs     | 25                                          | 10                                  |
| Co-in-CNTs (I)  | 21                                          | 0.5                                 |
| Co-in-CNTs (II) | 9                                           | 5                                   |

<sup>a</sup>From TEM histogram

<sup>b</sup>Measured by ICP

## 1.6 XPS & EDX:

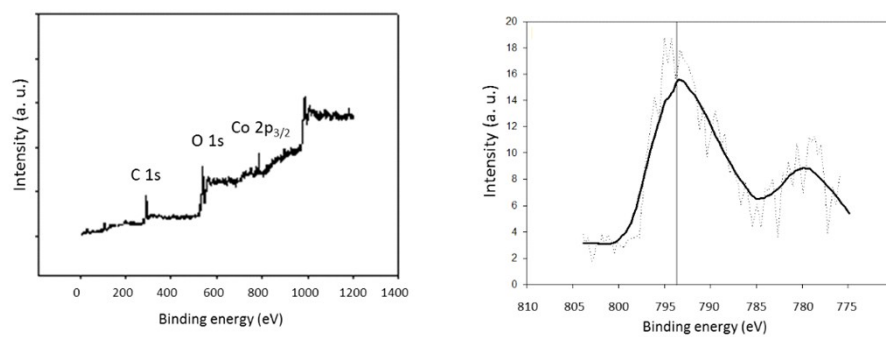

**Figure S4.** XPS spectrum of Co-in-CNTs (II)

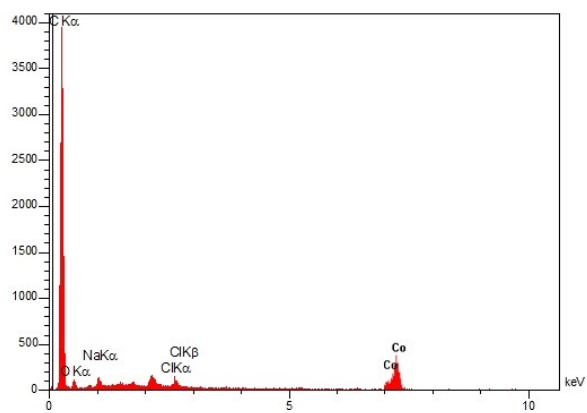

**Figure S5.** EDX spectrum of Co-in-CNTs (II)

## 2. Experimental

*Synthesis of Cobalt Nanoparticle Catalyst Supported on the Internal Surface of MW-CNTs (method I).*

A solution (20 mL) of concentrated nitric acid (68–70%, Sigma-Aldrich Co.) and sulfuric acid (40%) was prepared and 0.5 g multiwalled carbon nanotubes (MW-CNTs, purity > 95%, i.d. = 5–10 nm, o.d. =20–30 nm, Specific surface area >200 (m<sup>2</sup>/g)) was suspended in it; and refluxed at 110 °C for 5 h.<sup>1</sup> The black solid was filtrated and washed with deionized water several times to pH 7 then dried in an oven at 100 °C overnight. The solid (opened end MW-CNTs (Figure 1a)) was redispersed in aqueous solution of 1.0 g cobalt(II) chloride hexahydrate (>98%, Sigma-Aldrich Co.) and reducing agent (NaBH<sub>4</sub> (1 mol%)). The obtained solution was ultrasonicated for 1h and after that mixed for 3h at 45 °C. The loading amount was~0.5 wt % as measured using inductively coupled plasma atomic emission spectroscopy (ICP-AES). The black product filtrated and dried at 80 °C overnight in an oven. The Co-in-MW-CNTs was formed and as shown in Figure 1c the cobalt nanoparticles filled internal surface of MW-CNTs.

*Synthesis of Cobalt Nanoparticle Catalysts Supported on the Internal Surface of MW-CNTs (method II).*

Other methods was tested to synthesized these materials: A solution (20 mL) of concentrated nitric acid (68–70%, Sigma-Aldrich Co.) and sulfuric acid (40%) was prepared and 0.5 g multiwalled carbon nanotubes (MW-CNTs, purity > 95%, i.d. = 5–10 nm, o.d. =20–30 nm, Specific surface area >200 (m<sup>2</sup>/g)) was suspended in it, and refluxed at 110 °C for 5 h. The black solid was filtrated and washed with deionized water several times to pH 7 then dried in an oven at 100 °C overnight;. The solid (opened end MW-CNTs) was redispersed in aqueous solution of

1.0 g cobalt(II) chloride hexahydrate (>98%, Sigma-Aldrich Co.). The obtained solution was ultrasonicated for 3 h at 35 °C. The loading amount was ~5 wt % as measured using inductively coupled plasma atomic emission spectroscopy (ICP-AES). The black product filtrated and dried at 80 °C overnight in an oven. To forming the reactive Co-in-MW-CNTs catalyst, the precursor was activated by reduction using NaBH<sub>4</sub> (1 mol%) at 80 °C for 2 h, the cobalt nanoparticles was tagged on internal walls of MW-CNTs, more density of NPs and more smaller NPs compared to previous technic was achieved (Figure 1b).

*Synthesis of Cobalt Nanoparticle Catalysts Supported on External Surfaces of MW-CNTs.*

A solution (20 mL) of concentrated nitric acid (68–70%, Sigma-Aldrich Co.) and sulfuric acid (40%) was prepared and 0.5 g multiwalled carbon nanotubes (MW-CNTs, purity > 95%, i.d. = 5–10 nm, o.d. = 20–30 nm, Specific surface area >200 (m<sup>2</sup>/g)) was suspended in it and refluxed at 110 °C for 5 h. The black solid was filtrated and washed with deionized water several times to pH 7 then dried in an oven at 100 °C overnight. The solid (opened end MW-CNTs) was redispersed in aqueous solution of 1.0 g cobalt(II) chloride hexahydrate (>98%, Sigma-Aldrich Co.). After ultrasonication for 1 h, the solution was mixed for 5 h at 140 °C. It was activated by reduction using NaBH<sub>4</sub> at 80 °C for 2 h. The loading amount was ~10 wt % as measured using inductively coupled plasma atomic emission spectroscopy (ICP-AES). The Co-out-MW-CNTs was gave which its TEM was shown in Figure 1d.

*General procedure for the Heck reaction*

In a round-bottom flask equipped with a mechanical stirrer, a mixture of K<sub>2</sub>CO<sub>3</sub> (2 equiv.), olefin (1.2 mmol), and aryl halide (1 mmol) in PEG (2 mL) was added to 20 mg of catalyst and the flask was equipped with a condenser for refluxing. The abovementioned mixture was heated at 60 °C in an oil bath. The progress of the reaction was monitored by TLC (hexane/EtOAc, 80 :

20) and gas chromatography (GC). After the completion of the reaction, the mixture was diluted with dichloromethane and water. The organic layer was washed with brine, dried over anhydrous  $\text{MgSO}_4$ , and concentrated under reduced pressure. The residue was purified by column chromatography. The products were characterized by comparing their physical properties, such as m.p., IR,  $^1\text{H}$ , and  $^{13}\text{C}$  NMR spectra, with those reported in literature.

### 3. NMR spectra of products

The products were characterized by comparing their physical properties m.p., IR,  $^1\text{H}$ ,  $^{13}\text{C}$  NMR spectra with those found in the literature <sup>1-5</sup>.

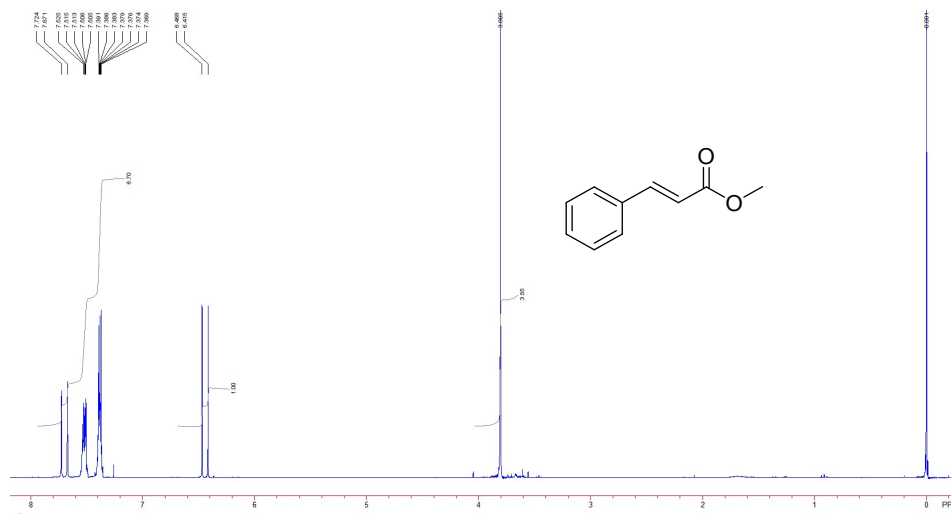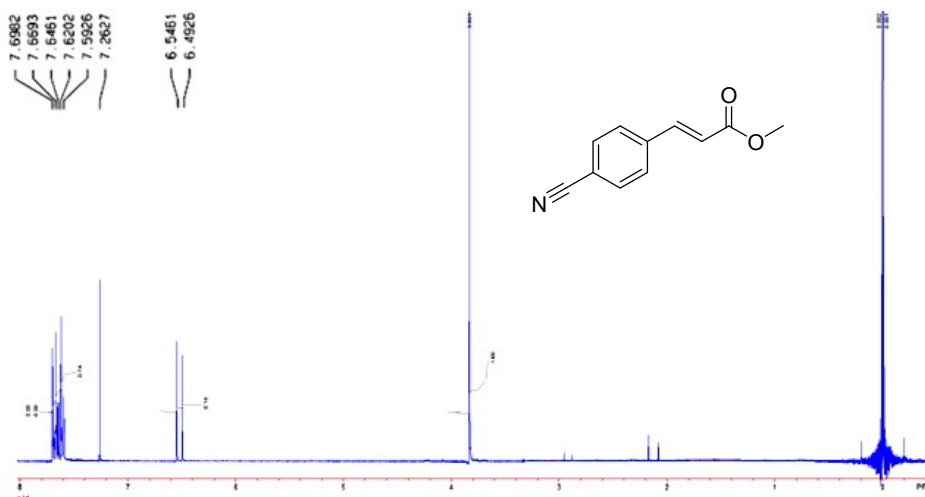



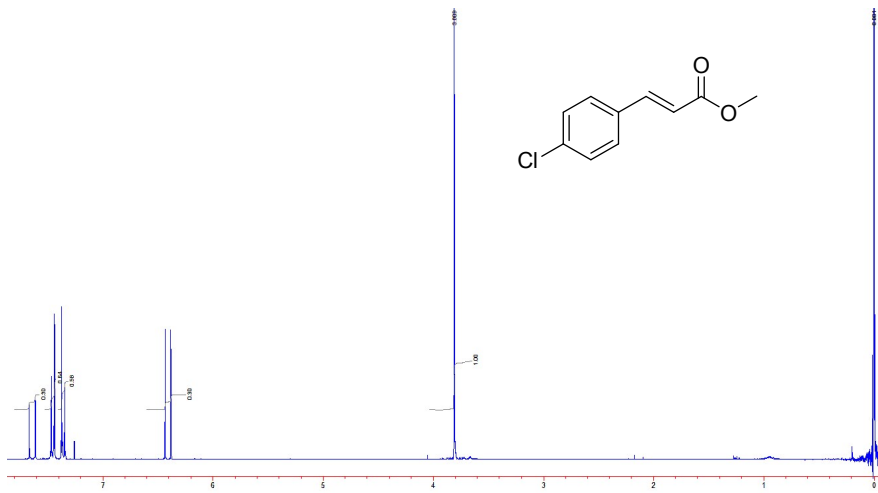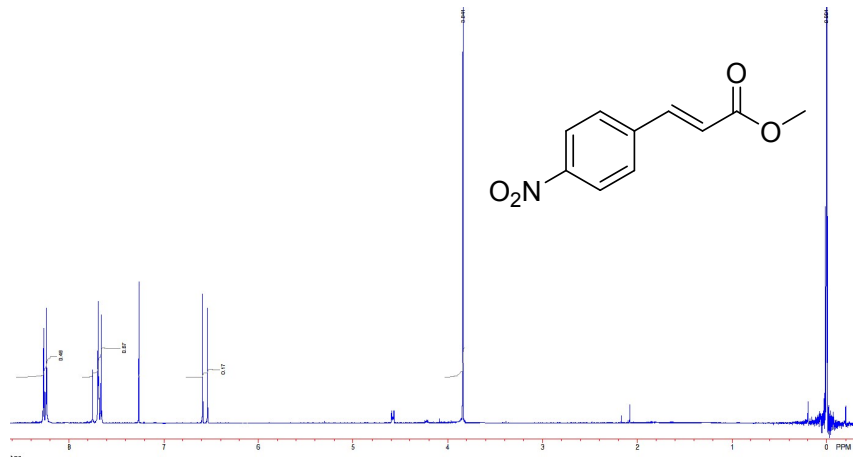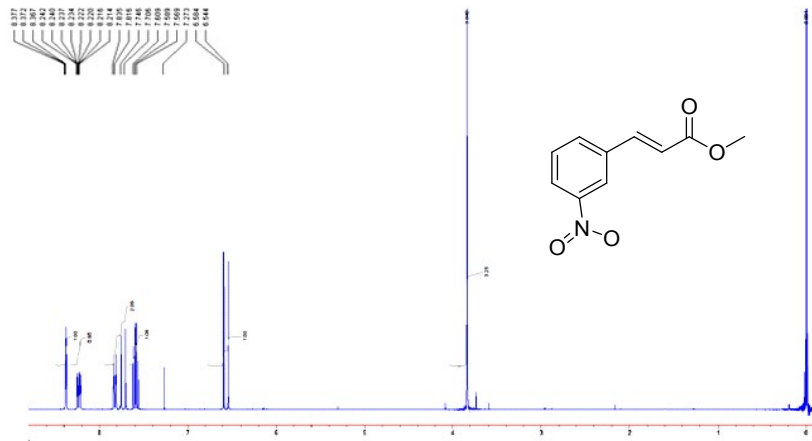

**References:**

1. Y. T. Shieh, G. L. Liu, H. H. Wu, C. C. Lee, *Carbon*, 2007, 45, 1880-1890.
